# Supplementary material for: The New General Biological Property of Stem-like Tumor Cells (Part II: Surface Molecules, Which Belongs to Distinctive Groups with Particular Functions, Form a Unique Pattern Characteristic of a Certain Type of Tumor Stem-like Cells)
Source: MDPI journal article supplement (doi:10.3390/ijms232415800), 2022-12-13
Supplement: s1 [file s1]

## Supplementary Material S2

**Table S1.** Primers used for real-time PCR.

| Model               | Target Gene<br>Transcript ID           | Forward Primer (Tm, °C)<br>Reverse Primer (Tm, °C)                                     | Product<br>Size,<br>b.p. |
|---------------------|----------------------------------------|----------------------------------------------------------------------------------------|--------------------------|
| Krebs-2             | <i>Mreg</i><br>ENSMUST00000048860.9    | 5'-AAGTGAGGAACCGATGGAGACGA-3'<br>(58.6)<br>5'-AGCATCTCCCGGGCTTTCCT-3' (58.7)           | 130                      |
|                     | <i>Col3a1</i><br>ENSMUST00000087883.13 | 5'-GGCCCTGGTGAGAGAGGTGAACAT-3'<br>(61.3)<br>5'-GGACCACCAGGACTACCACGTTCA-3'<br>(60.8)   | 221                      |
|                     | <i>Prg4</i><br>ENSMUST00000164600.8    | 5'-GATGGACTGACTACGCTGCGCAA-3'<br>(61.1)<br>5'-GGTGAAGCGCCAGTACTGAGAATCC-3'<br>(61.1)   | 207                      |
|                     | <i>Selp</i><br>ENSMUST00000162746.2    | 5'-ACGACTCCTGGACAGGGCACAA-3' (60.3)<br>5'-TTTGACCGCTCTGCACATGGG-3' (60.4)              | 174                      |
|                     | <i>Marco</i><br>ENSMUST00000027639.8   | 5'-CCCGGGAATTGCTGGGAATC-3' (59.9)<br>5'-GGGCTTCCAGTGTCTCCCTTTCT-3' (58.7)              | 138                      |
|                     | <i>Fgfr1</i><br>ENSMUST00000084027.13  | 5'-TGCCTGTGGAGGAACCTTTTCAAGC-3'<br>(60.4)<br>5'-CAATGCGGTCCAGGTCTTCCAC-3' (60.2)       | 162                      |
|                     | <i>Actb</i><br>ENSMUST00000100497.11   | 5'-GGTGTGATGGTGGGAATGGG-3' (55.9)<br>5'-TCTCCATGTCGTCCCAGTTGG-3' (56.3)                | 127                      |
|                     | <i>Cdh11</i><br>ENST00000268603.9      | 5'-ATCGCCATCCTCGCCTGCAT-3' (61.2)<br>5'-GGGTGGCAATATCAAAGGCTTCTG-3'<br>(59.7)          | 181                      |
|                     | <i>Cdh17</i><br>ENST00000027335.8      | 5'-CCCCTCAGTGACACCTGGAAGTCTCA-3'<br>(64.3)<br>5'-CCGACCCCCATCATTGATGC-3' (59.4)        | 219                      |
|                     | <i>Col4a5</i><br>ENST00000328300.11    | 5'-GCCAGGTACCCGTGGTTTGGAT-3' (60.6)<br>5'-CAAGTCTTGACCGTGGGCTCTTTT-3'<br>(59.6)        | 217                      |
| EBV+ B-<br>lymphoma | <i>Sell</i><br>ENST00000236147.6       | 5'-ACCATGGACTGTACTCACCTTTGG-3'<br>(59.1)<br>5'-AATCTGGTGCTGATAGAGGCTCACA-3'<br>(58.1)  | 181                      |
|                     | <i>Vcam1</i><br>ENST00000294728.7      | 5'-ATGTGAAGGAATTAACCAGGCTGGA-3'<br>(58.9)<br>5'-CCGCTTTTTTCTTCAGGATTATCCA-3'<br>(58.1) | 185                      |
|                     | <i>Megf6</i><br>ENST00000356575.9      | 5'-GCTTCCACGGCCACTTCTGTGA-3' (60.9)<br>5'-TGGCCCCTTCTGCAATCCAG-3' (59.5)               | 172                      |
|                     |                                        |                                                                                        |                          |

|                    |                                           |     |
|--------------------|-------------------------------------------|-----|
| <i>Scarf2</i>      | 5'-CCAGCGACAAATCGGCGCATAC-3' (63.1)       | 220 |
| ENST00000622235.5  | 5'-AGCTCAGCGGCCAACATGGA-3' (60.2)         |     |
| <i>Scarf1</i>      | 5'-ACCGCCTGGGTGGACAACAT-3' (59.0)         | 129 |
| ENST00000640237.1  | 5'-CCTGTGGCCTGTCCTCTGACAATC-3'<br>(58.6)  |     |
| <i>Cd14</i>        | 5'-CCCACAGCCTAGACCTCAGCCACAA-3'<br>(64.1) | 182 |
| ENST00000302014.11 | 5'-CCTGTTCAGTCTGTTGCAGCTGAGA-3'<br>(59.6) |     |
| <i>Rplp0</i>       | 5'-AGGCCTTCTTGGCTGATCCATCT-3' (59)        | 135 |
| ENST00000392514.9  | 5'-TATCCTCGTCCGACTCCTCCGA-3' (59)         |     |
