# Supplementary material for: The New General Biological Property of Stem-like Tumor Cells (Part II: Surface Molecules, Which Belongs to Distinctive Groups with Particular Functions, Form a Unique Pattern Characteristic of a Certain Type of Tumor Stem-like Cells)
Source: MDPI journal article supplement (doi:10.3390/ijms232415800), 2022-12-13
Supplement: s1 [file s1]

## Supplementary Material S1

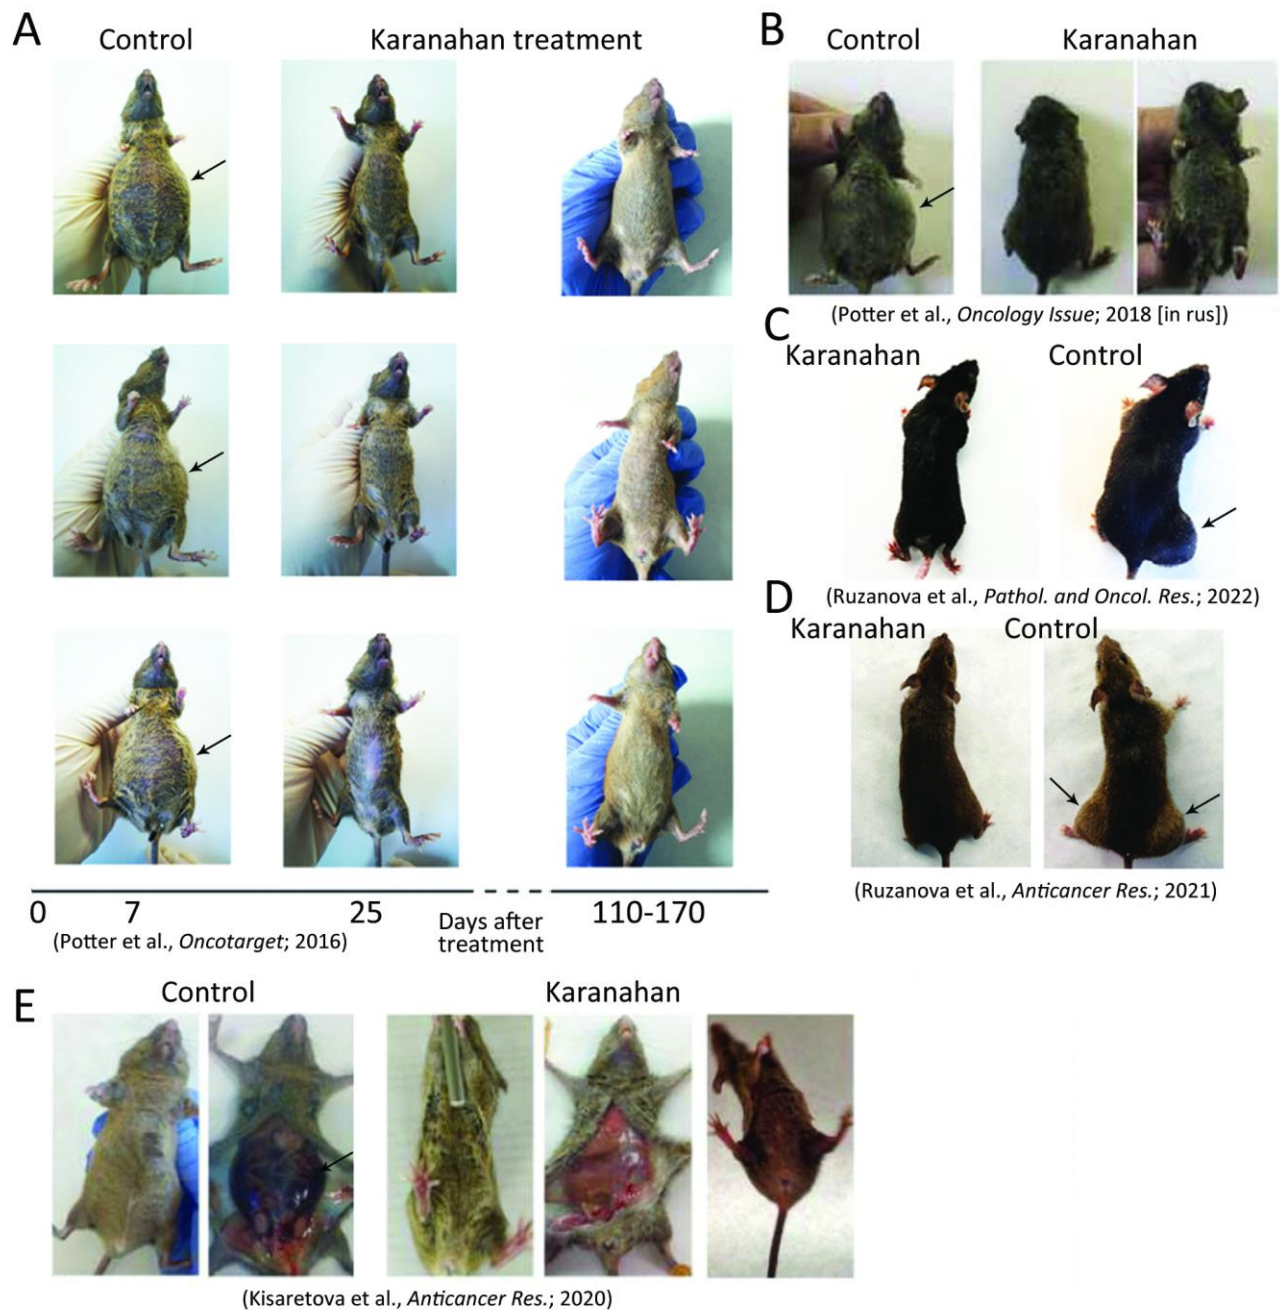

**Figure S1.** Efficacy of the Karanahan approach shown in different mouse tumor models. Overall visual condition of experimental animals prior and after the therapy is shown. (A) Krebs-2 ascites. Mice before the therapy (left panels), during ascites regression period (~day 25 post the first CP injection, middle panels) and cured mice on day 150 of the experiment (right panels) [11]. (B) Ascitic tumor G-29 [90]. (C) Lewis carcinoma with an intramuscular graft [10]. (D) Solid Krebs-2 tumor. Tumors were grafted intramuscularly in the two hind paws of the mouse [12]. (E) RLS tumor [9]. The presence of a tumor is indicated by an arrow.

Supplementary Material S1 references are presented in the main text of the manuscript.
